# Supplementary material
Source: Springer Nature journal article supplement (https://www.springermedizin.de/resource/supplementary/12885_2013_5283_MOESM2_ESM.pdf/9465620)
Supplement: MOESM2 [file 9465620]

**Additional Information Table S1C.** Study characteristics of articles included in the review investigating CXCR4 expression prevalences in breast cancer, *in situ* carcinoma, benign breast disease, and normal breast tissue.

| Reference                                  | Study population                                      |                     |                                                     | Patient and tumor characteristics |                         |                |                    | Histology                   |                        |        |        |         |          |     | IHC |       |     |                    |                            |                         |    |
|--------------------------------------------|-------------------------------------------------------|---------------------|-----------------------------------------------------|-----------------------------------|-------------------------|----------------|--------------------|-----------------------------|------------------------|--------|--------|---------|----------|-----|-----|-------|-----|--------------------|----------------------------|-------------------------|----|
|                                            | First author<br>Year, Country of patient<br>inclusion | Inclusion<br>period | No. of<br>invasive<br>cancers<br>(+other<br>tissue) | Important<br>selection criteria   | Age(range/<br>SD)       | Tumor size*    | Histological grade |                             | LN <sup>+</sup><br>(%) | Normal | Benign | In situ | invasive | IDC | ILC | Other | TMA | Cores (mm)         | Antibody<br>(manufacturer) | Obs.                    |    |
|                                            |                                                       |                     |                                                     |                                   |                         | pT             | 0%                 | 100%                        | 0%                     | 100%   |        |         |          |     |     |       |     |                    |                            |                         |    |
| <b>Huang, S.[92]</b><br>2012, China        | 2002-2007                                             | 197<br>(+20)        | -                                                   |                                   | 44(23-75)               | 1<br>2/3       |                    | I<br>II<br>III              |                        | 56     | ○      | ●       | ○        | ○   | ●   | ○     | ○   | ○                  | 12G5 (Abcam)               | ns                      |    |
| <b>Jin, F.[93]</b><br>2012, Germany        | 1989-1993                                             | 140                 | -                                                   |                                   | ns                      | ns             |                    | ns                          |                        | ns     | ○      | ○       | ○        | ●   | ○   | ○     | ○   | na (na)            | ns                         |                         |    |
| <b>Ibrahim, T.[94]</b><br>2011, Italy,     | 1997-2000                                             | 40                  | -                                                   |                                   | 66 <sup>a</sup> (42-87) | ns             |                    | I<br>II<br>III              |                        | ns     | ○      | ○       | ○        | ○   | ●   | ○     | ○   | Ab58176<br>(Abcam) | 2                          |                         |    |
| <b>Sacanna, E.[95]</b><br>2011, Italy      | 1997-2000                                             | 40                  | -                                                   |                                   | 66 <sup>a</sup> (42-87) | ns             |                    | I<br>II<br>III              |                        | ns     | ○      | ○       | ○        | ○   | ●   | ○     | ○   | Ab58176<br>(Abcam) | 2                          |                         |    |
| <b>Bohn, O.L.[96]</b><br>2010, USA         | ns                                                    | 64                  | M-                                                  |                                   | ns                      | 1<br>2<br>3    |                    | ns                          |                        | 41     | ○      | ○       | ○        | ○   | ●   | ●     | ●   | ●                  | 3 0.6                      | Ab2074<br>(Abcam)       | 1  |
| <b>Kobayashi, T.[97]</b><br>2010, Japan    | ns                                                    | 223                 | -                                                   |                                   | 52(30-82)               | 1/2<br>3       |                    | I <sup>b</sup><br>II<br>III |                        | 45     | ○      | ○       | ○        | ○   | ●   | ●     | ●   | ●                  | 2 2.0                      | MAB173 (R&D<br>Systems) | 2  |
| <b>Liu, Y.[98]</b><br>2010, China          | 1997-2004                                             | 200                 | -                                                   |                                   | 51(37-74)               | 1<br>2<br>3    |                    | I<br>II<br>III              |                        | 50     | ○      | ○       | ○        | ○   | ●   | ○     | ○   | ●                  | 2 2.0                      | ns (Abcam)              | 2  |
| <b>Andre, F.[99]</b><br>2009, France       | 1989-1995                                             | 794                 | grade 2-3 or LN+                                    |                                   | 56 <sup>a</sup> (ns)    | <3 cm<br>≥3 cm |                    | I<br>II<br>III              |                        | 43     | ○      | ○       | ○        | ●   | ○   | ○     | ○   | ●                  | 3 ns                       | MAB172 (R&D<br>systems) | 2  |
| <b>Cabioglu, N.[100]</b><br>2009, USA      | ns                                                    | 29                  | M+                                                  |                                   | 44(27-79)               | ns             |                    | I<br>II<br>III              |                        | ns     | ○      | ○       | ○        | ○   | ●   | ●     | ●   | ○                  | MAB173 (R&D<br>systems)    | ns                      |    |
| <b>Hassan, S.[101]</b><br>2009, Canada     | 2000-2003                                             | 236                 | stage I-III                                         |                                   | ns                      | 1<br>2<br>3    |                    | I<br>II<br>III              |                        | 46     | ○      | ○       | ○        | ●   | ○   | ○     | ○   | ●                  | 2/3 ns                     | TN14003 (na)            | ns |
| <b>Kim, J.O.[102]</b><br>2009, South Korea | 2000-2009                                             | 44                  | -                                                   |                                   | 52 <sup>a</sup> (28-77) | 1<br>2<br>3    |                    | I<br>II<br>III              |                        | 41     | ○      | ○       | ○        | ○   | ●   | ○     | ○   | ●                  | ns 5.0                     | ns (Abcam)              | ns |
| <b>Liu, F.[103]</b><br>2009, China         | 2004-2007                                             | 199                 | Including micro-<br>papillary carc.                 |                                   | 53 <sup>a</sup> (29-83) | 1<br>2<br>3    |                    | I<br>II<br>III              |                        | 70     | ○      | ○       | ○        | ○   | ●   | ○     | ●   | ○                  | MAB172 (R&D<br>systems)    | ns                      |    |
| <b>Yasuoka, H.[104]</b>                    | 1981-1992                                             | 113                 | family history -                                    |                                   | 51(24-87)               | 1              |                    | I/II                        |                        | 52     | ○      | ○       | ○        | ○   | ●   | ○     | ●   | ○                  | ns (Abcam)                 | 3                       |    |

|                                               |           |                |                       |                         |             |            |                |  |     |   |   |   |   |   |   |   |   |                      |                      |     |                      |    |
|-----------------------------------------------|-----------|----------------|-----------------------|-------------------------|-------------|------------|----------------|--|-----|---|---|---|---|---|---|---|---|----------------------|----------------------|-----|----------------------|----|
| 2009, Japan                                   |           |                |                       |                         | 2/3         |            | III            |  |     |   |   |   |   |   |   |   |   |                      |                      |     |                      |    |
| <b>Zhou, W.[105]</b><br>2009, China           | 2004-2006 | 63<br>(+20)    | Stage ≤IIIA           | 53 <sup>a</sup> (32-80) | 1<br>2<br>3 |            | I/II<br>III    |  | 46  | ● | ○ | ○ | ○ | ● | ○ | ● | ○ |                      | MAB172 (R&D systems) | 2   |                      |    |
| <b>Blot, E.[106]</b><br>2008, France          | 1991-1991 | 194            | -                     | 57 <sup>a</sup> (26-84) | 1<br>2/3    |            | I<br>II/III    |  | 56  | ○ | ○ | ○ | ○ | ● | ○ | ○ | ○ |                      | 12G5 (R&D systems)   | ns  |                      |    |
| <b>Fujii, T.[107]</b><br>2008, Japan          | 1993-1999 | 73             | -                     | 56 <sup>a</sup> (11)    | 1<br>2/3    |            | I<br>II<br>III |  | 46  | ○ | ○ | ○ | ○ | ● | ○ | ○ | ○ |                      | ns (Prosci Inc.)     | 2   |                      |    |
| <b>Woo, S.[108]</b><br>2008, South Korea      | 1997-2002 | 105            | M-                    | 50(28-78)               | 1<br>2<br>3 |            | I<br>II<br>III |  | 52  | ○ | ○ | ○ | ○ | ● | ○ | ○ | ○ |                      | MAB172 (R&D systems) | 2   |                      |    |
| <b>Yasuoka, H.[109]</b><br>2008, Japan        | 1981-1992 | 113            | family history -      | 51(24-87)               | 1<br>2/3    |            | I/II<br>III    |  | 52  | ○ | ○ | ○ | ○ | ○ | ● | ○ | ● | ○                    | ns (Abcam)           | 3   |                      |    |
| <b>Hao, L.[110]</b><br>2007, China            | 2002-2005 | 76<br>(+14)    | -                     | 50(ns)                  | 1<br>2/3    |            | I<br>II<br>III |  | 54  | ● | ● | ○ | ○ | ● | ○ | ○ | ○ |                      | MAB172 (R&D systems) | 2*  |                      |    |
| <b>Tsoli, E.[111]</b><br>2007, UK             | 1999-2001 | 151            | -                     | 63(29-94)               | ns          |            | I<br>II<br>III |  | 38  | ○ | ○ | ○ | ○ | ○ | ● | ● | ○ | ●                    | 4                    | 3.0 | MAB171 (R&D systems) | ns |
| <b>Andre, F.[112]</b><br>2006, France         | 1972-1979 | 133            | LN+                   | 50(29-64)               |             | 25 (10-90) | I/II<br>III    |  | 100 | ○ | ○ | ○ | ○ | ● | ○ | ○ | ○ |                      | MAB172 (R&D systems) | 2   |                      |    |
| <b>Kim, R.[113]</b><br>2006, Japan            | 1980-2001 | 22             | M+ (bone)             | 55(23-79)               | ns          |            | ns             |  | 69  | ○ | ○ | ○ | ○ | ○ | ● | ○ | ○ |                      | ns (Abcam)           | ns  |                      |    |
| <b>Salvucci, O.[114]</b><br>2006, Switzerland | 1985-2001 | 1808<br>(+214) | -                     | 62(26-101)              | ns          |            | I<br>II<br>III |  | 48  | ● | ● | ● | ○ | ○ | ● | ● | ● | ●                    | ns                   | 0.6 | MAB172 (R&D systems) | 2  |
| <b>Shim, H.[115]</b><br>2006, USA             | ns        | 94<br>(+44)    | -                     | ns                      | 1/2<br>3    |            | ns             |  | 21  | ● | ○ | ○ | ○ | ○ | ○ | ○ | ○ | ●                    | ns                   | ns  | TN14003 (na)         | ns |
| <b>Su, Y.C.[116]</b><br>2006, Taiwan          | 1998-2004 | 85             | pT1-2, clinically LN- | 44 <sup>a</sup> (ns)    | 1<br>2<br>3 |            | I<br>II<br>III |  | 31  | ○ | ○ | ○ | ○ | ○ | ○ | ○ | ○ |                      | MAB172 (R&D systems) | 2   |                      |    |
| <b>Cabioglu, N.[117]</b><br>2005, Turkey      | 2000-2001 | 18             | clinically LN-        | 45(38-76)               | 1<br>2/3    |            | ns             |  | 67  | ○ | ○ | ○ | ○ | ○ | ○ | ○ | ○ |                      | MAB173 (R&D systems) | ns  |                      |    |
| <b>Cabioglu, N. 2[118]</b><br>2005, USA       | ns        | 197            | pT1                   | ns                      | 1<br>2<br>3 |            | ns             |  | 50  | ○ | ○ | ○ | ○ | ○ | ○ | ○ | ○ |                      | MAB173 (R&D systems) | ns  |                      |    |
| <b>Li, Y.M.[119]</b><br>2004, USA             | ns        | 219            | -                     | ns                      | ns          |            | ns             |  | ns  | ○ | ○ | ○ | ○ | ○ | ○ | ○ |   | MAB170 (R&D systems) | 2                    |     |                      |    |
| <b>Schmid, B.C.[120]</b><br>2004, Austria     | 2000-2001 | 7<br>(+28)     | pT1-2                 | ns                      | 1/2<br>3    |            | ns             |  | ns  | ○ | ○ | ○ | ○ | ○ | ○ | ○ |   | 12G5 (R&D systems)   | ns                   |     |                      |    |
| <b>Kato, M.[121]</b><br>2003, Japan           | 1990-1996 | 59             | -                     | 53 <sup>a</sup> (9)     | 1<br>2<br>3 |            | I<br>II<br>III |  | 49  | ○ | ○ | ○ | ○ | ○ | ○ | ○ |   | ns (BD Pharmingen)   | 2                    |     |                      |    |

a: mean; \*: mean size in mm (range or SD); b: nuclear grade; ns: not stated; na: not applicable; ○: tissue not investigated; ●: tissue investigated; ◎: both TMA and full sections investigated; IDC: invasive ductal carcinoma; ILC: invasive lobular carcinoma; IBC: inflammatory breast cancer; ABC: advanced breast cancer; TN: triple negative; LN: lymph node; TMA: tissue microarray PT: phyllodes tumors FA: fibroadenoma; M: distant metastasis, Obs.: number of observers evaluating staining result, +: positive; -: negative
